# Supplementary material
Source: PubMed Central journal article supplement (PMC7469378)
Supplement: ao0c02887_si_001.pdf [file ao0c02887_si_001.pdf]

**SUPPORTING INFORMATION FOR****Unconventional Type III halogen···halogen interactions: A quantum mechanical elucidation of  $\sigma$ -hole··· $\sigma$ -hole and di- $\sigma$ -hole interactions**

Mahmoud A. A. Ibrahim\* and Nayra A. M. Moussa

Computational Chemistry Laboratory, Chemistry Department, Faculty of Science, Minia University, Minia  
61519, Egypt

\* Corresponding author: Mahmoud A. A. Ibrahim; m.ibrahim@compchem

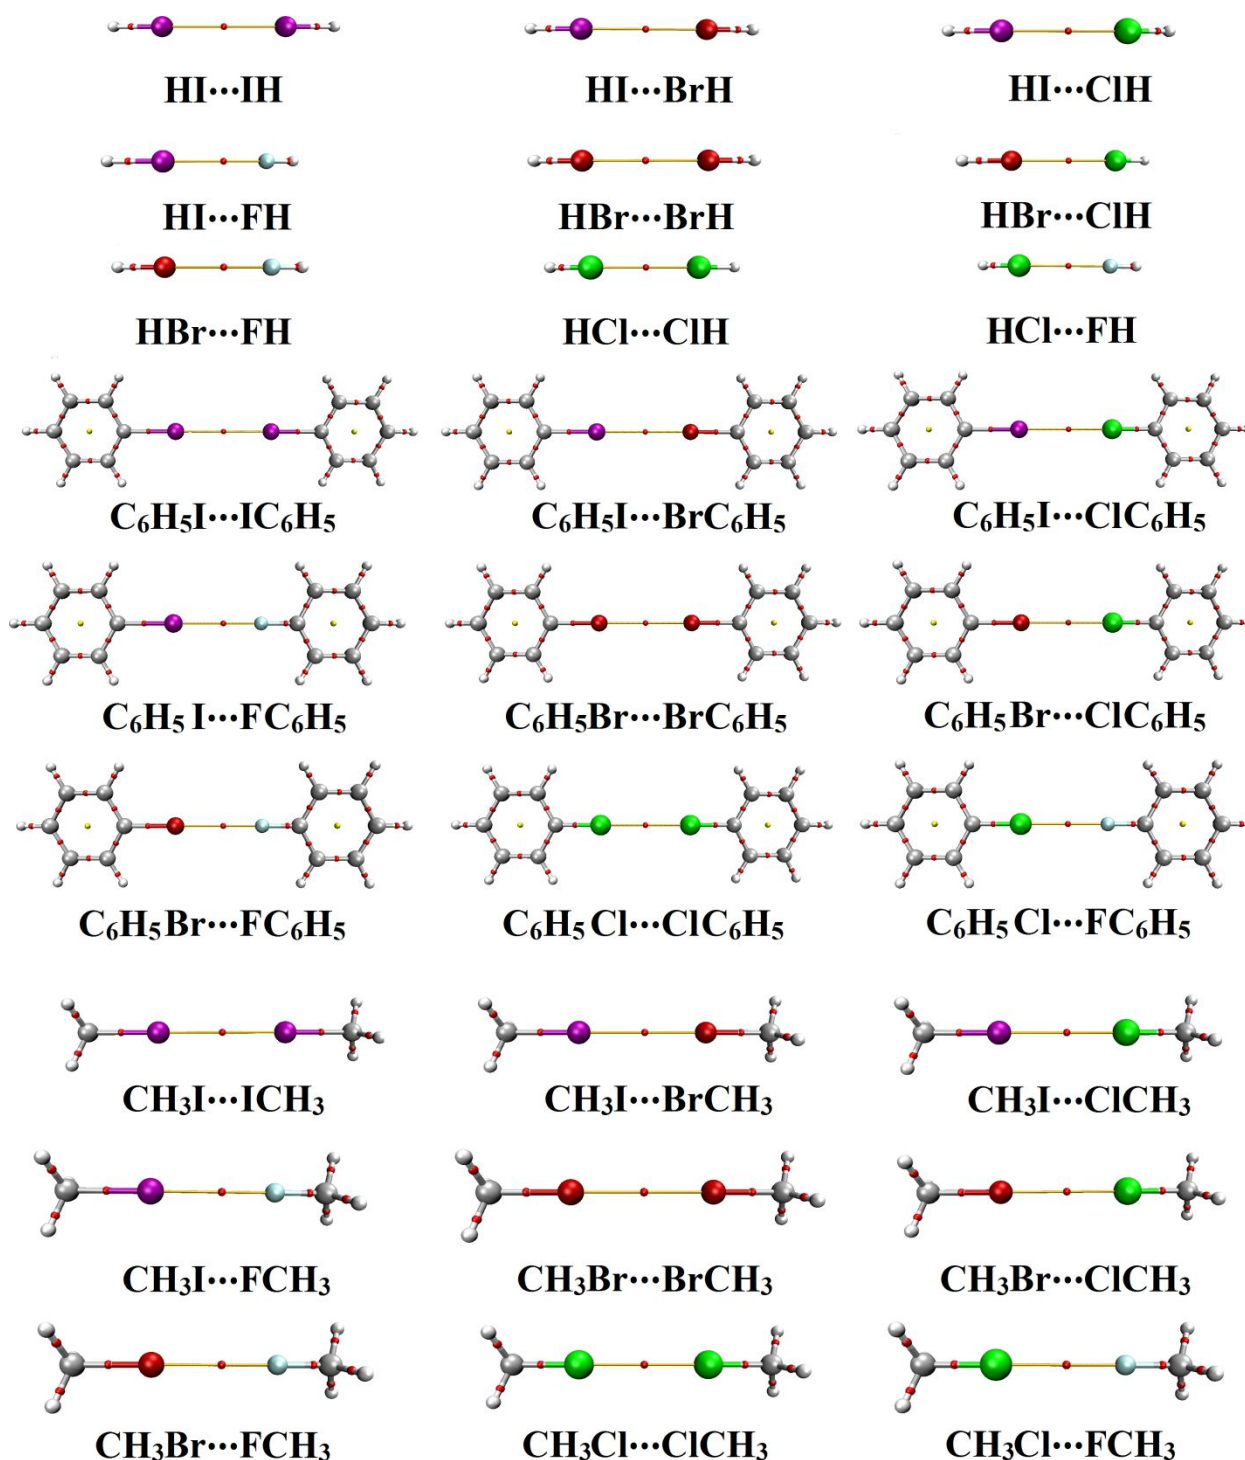

**Figure S1.** Quantum theory of atoms in molecules (QTAIM) diagrams for  $\text{HX}\cdots\text{XH}$ ,  $\text{C}_6\text{H}_5\text{X}\cdots\text{XC}_6\text{H}_5$ , and  $\text{CH}_3\text{X}\cdots\text{XCH}_3$  (where  $\text{X} = \text{F}, \text{Cl}, \text{Br}, \text{and I}$ ) complexes at the most favorable  $\text{X}\cdots\text{X}'$  distances. Red dots indicate the locations of bond critical points (BCP) at bond paths (BP) between the two interacting monomers.

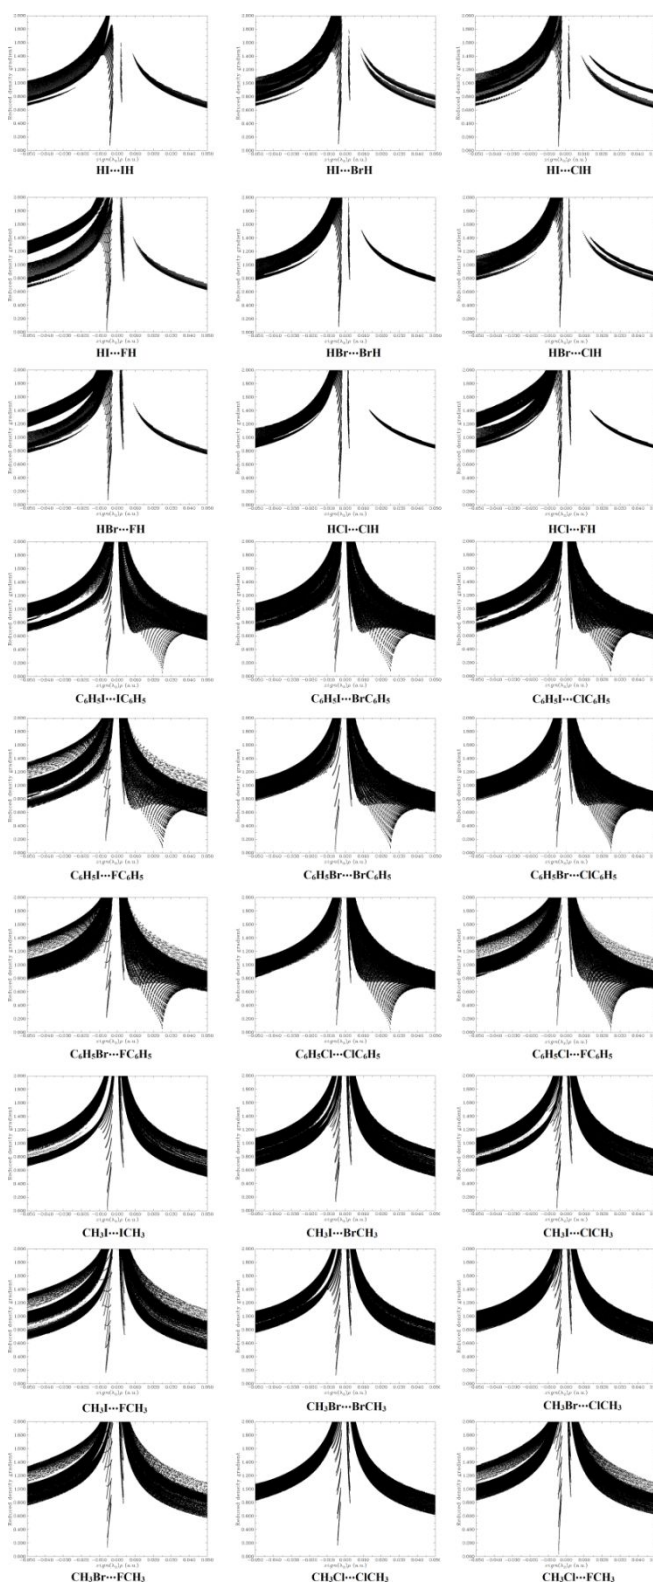

**Figure S2.** 2D noncovalent interaction (NCI) reduced density gradient (RDG) plots for  $HX\cdots XH$ ,  $C_6H_5X\cdots XC_6H_5$ , and  $CH_3X\cdots XCH_3$  (where  $X = F, Cl, Br,$  and  $I$ ) complexes at the most favorable  $X\cdots X/X'$  distances.

Unconventional Type III halogen $\cdots$ halogen interactions

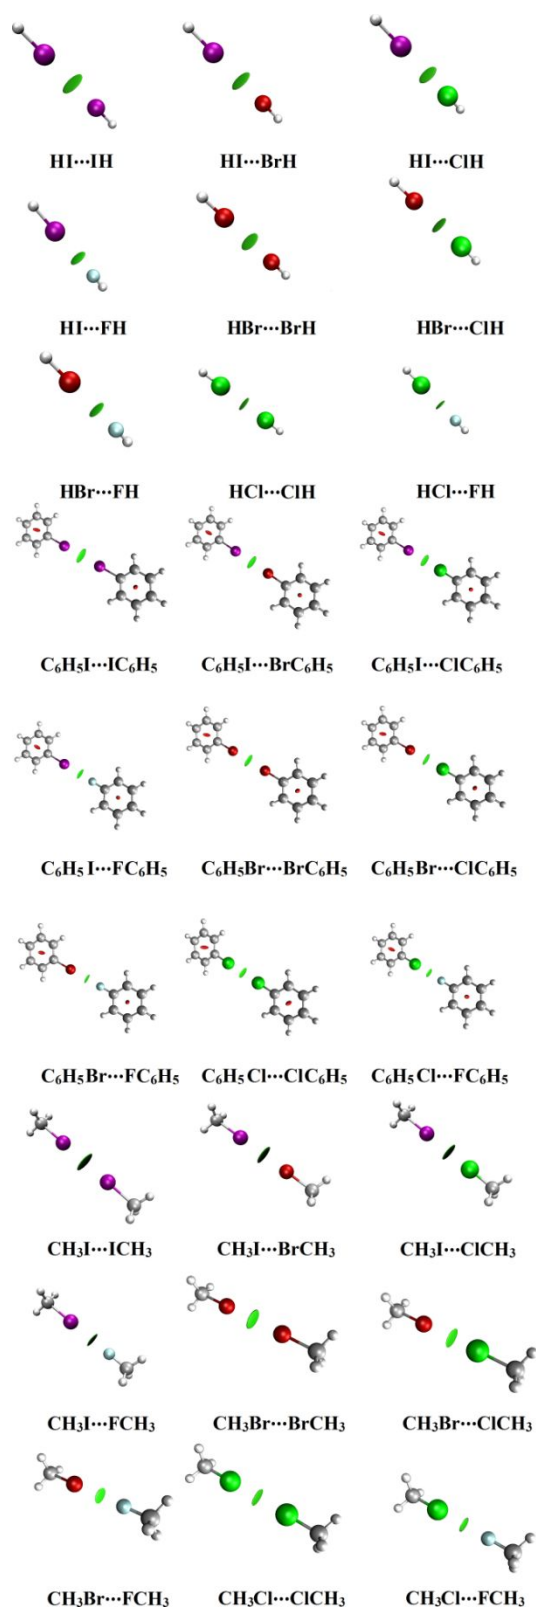

**Figure S3.** 3D noncovalent interaction (NCI) plots for  $\text{HX}\cdots\text{XH}$ ,  $\text{C}_6\text{H}_5\text{X}\cdots\text{XC}_6\text{H}_5$ , and  $\text{CH}_3\text{X}\cdots\text{XCH}_3$  (where  $\text{X}=\text{F}, \text{Cl}, \text{Br},$  and  $\text{I}$ ) complexes at the most favorable  $\text{X}\cdots\text{X}/\text{X}'$  distances.

Unconventional Type III halogen $\cdots$ halogen interactions

**Table S1.** List of hits resulted from CSD survey, including CSD code, measured and absolute halogen...halogen distance (in Å), A-halogen...halogen angle (in degree).

| Halogen...halogen System | CSD Code | Halogen...halogen Distance (Å) <sup>a</sup> |          | A-Halogen...halogen Angle ( $\theta$ ) |
|--------------------------|----------|---------------------------------------------|----------|----------------------------------------|
|                          |          | Measured                                    | Absolute |                                        |
| I...I                    | AYURES   | 3.64                                        | 0.32     | 180.00°                                |
|                          | Br...Br  | BALLAD                                      | 3.31     | 0.39                                   |
| Br...Br                  | BTRPYC   | 3.70                                        | 0        | 180.00°                                |
|                          | CUGSEC   | 3.41                                        | 0.29     | 180.00°                                |
|                          | KECCED   | 3.31                                        | 0.39     | 180.00°                                |
|                          | KOGLUQ   | 3.44                                        | 0.26     | 180.00°                                |
|                          | KOGLUQ01 | 3.38                                        | 0.32     | 180.00°                                |
|                          | KOGMEB   | 3.38                                        | 0.32     | 180.00°                                |
|                          | KOGMIF   | 3.38                                        | 0.32     | 180.00°                                |
|                          | TPHMBR01 | 3.18                                        | 0.52     | 180.00°                                |
|                          | TPHMBR02 | 3.19                                        | 0.51     | 180.00°                                |
|                          | JERJIP   | 3.31                                        | 0.39     | 180.00°                                |
|                          | Cl...Cl  | ABOSUF01                                    | 3.01     | 0.49                                   |
| BALKUW                   |          | 3.23                                        | 0.27     | 180.00°                                |
| BEPZED                   |          | 3.33                                        | 0.17     | 180.00°                                |
| DANCAW                   |          | 3.32                                        | 0.18     | 180.00°                                |
| FANVOF                   |          | 3.15                                        | 0.35     | 179.63°                                |
| HPTBZC                   |          | 3.41                                        | 0.09     | 180.00°                                |
| JAWDOD                   |          | 3.15                                        | 0.35     | 179.31°                                |
| OLAWIH                   |          | 3.19                                        | 0.31     | 179.11°                                |
| SONKUC                   |          | 3.15                                        | 0.35     | 179.64°                                |
| VICREF                   |          | 3.20                                        | 0.3      | 180.00°                                |
| XOFFOQ                   |          | 3.08                                        | 0.42     | 180.00°                                |
| ZZZVTY12                 |          | 3.21                                        | 0.29     | 180.00°                                |

<sup>a</sup> Absolute distances calculated as difference between the measured distance and the sum of van der Waals radii of the interacted halogen atoms.

**Cartesian atomic coordinates**Hydrogen Halide

## HI...IH

|   |             |            |            |
|---|-------------|------------|------------|
| H | -1.60023904 | 0.00000000 | 0.00000000 |
| I | 0.00000000  | 0.00000000 | 0.00000000 |
| H | 5.66023880  | 0.00000000 | 0.00000000 |
| I | 4.06000000  | 0.00000000 | 0.00000000 |

## HI...BrH

|    |             |            |            |
|----|-------------|------------|------------|
| H  | -1.40375197 | 0.00000000 | 0.00000000 |
| Br | 0.00000000  | 0.00000000 | 0.00000000 |
| H  | 5.51023880  | 0.00000000 | 0.00000000 |
| I  | 3.91000000  | 0.00000000 | 0.00000000 |

## HI...ClH

|    |             |            |            |
|----|-------------|------------|------------|
| H  | -1.27474201 | 0.00000000 | 0.00000000 |
| Cl | 0.00000000  | 0.00000000 | 0.00000000 |
| H  | 5.42023880  | 0.00000000 | 0.00000000 |
| I  | 3.82000000  | 0.00000000 | 0.00000000 |

## HI...FH

|   |             |             |             |
|---|-------------|-------------|-------------|
| H | -0.92183799 | 0.00000000  | -0.00000000 |
| F | -0.00000000 | -0.00000000 | -0.00000000 |
| H | 4.90023881  | 0.00000000  | 0.00000000  |
| I | 3.30000001  | 0.00000000  | 0.00000000  |

## HBr...BrH

|    |             |            |            |
|----|-------------|------------|------------|
| H  | -1.40375197 | 0.00000000 | 0.00000000 |
| Br | 0.00000000  | 0.00000000 | 0.00000000 |
| H  | 5.16375209  | 0.00000000 | 0.00000000 |
| Br | 3.76000000  | 0.00000000 | 0.00000000 |

## HBr...ClH

|    |             |            |            |
|----|-------------|------------|------------|
| H  | -1.40375197 | 0.00000000 | 0.00000000 |
| Br | 0.00000000  | 0.00000000 | 0.00000000 |
| H  | 4.96474189  | 0.00000000 | 0.00000000 |
| Cl | 3.69000000  | 0.00000000 | 0.00000000 |

## HBr...FH

|    |             |             |             |
|----|-------------|-------------|-------------|
| H  | -1.40375197 | 0.00000000  | -0.00000000 |
| Br | -0.00000000 | -0.00000000 | -0.00000000 |
| H  | 4.12183809  | 0.00000000  | 0.00000000  |
| F  | 3.20000005  | 0.00000000  | 0.00000000  |

## Unconventional Type III halogen...halogen interactions

## HCl...ClH

|    |             |            |            |
|----|-------------|------------|------------|
| H  | -1.27474201 | 0.00000000 | 0.00000000 |
| Cl | 0.00000000  | 0.00000000 | 0.00000000 |
| H  | 4.88474189  | 0.00000000 | 0.00000000 |
| Cl | 3.61000000  | 0.00000000 | 0.00000000 |

## HCl...FH

|    |             |            |            |
|----|-------------|------------|------------|
| H  | -1.27474201 | 0.00000000 | 0.00000000 |
| Cl | 0.00000000  | 0.00000000 | 0.00000000 |
| H  | 4.13183805  | 0.00000000 | 0.00000000 |
| F  | 3.21000000  | 0.00000000 | 0.00000000 |

HalobenzeneC<sub>6</sub>H<sub>5</sub>I...IC<sub>6</sub>H<sub>5</sub>

|   |             |             |             |
|---|-------------|-------------|-------------|
| C | -4.16322231 | -0.00000665 | -1.20547998 |
| C | -2.76919150 | -0.00000736 | -1.21397328 |
| C | -2.08322096 | 0.00000000  | 0.00000000  |
| C | -2.76919341 | -0.00000000 | 1.21396959  |
| C | -4.16322327 | -0.00000338 | 1.20547402  |
| C | -4.86227894 | -0.00000267 | -0.00000233 |
| H | -4.69991302 | -0.00000828 | -2.14520216 |
| H | -2.22441101 | -0.00000882 | -2.14813900 |
| H | -2.22441888 | 0.00000258  | 2.14813590  |
| H | -4.69991016 | -0.00000083 | 2.14519882  |
| H | -5.94396782 | -0.00000271 | 0.00000215  |
| I | -0.00000000 | 0.00000000  | 0.00000000  |
| C | 8.06322241  | -0.00000062 | -1.20547998 |
| C | 6.66919136  | -0.00000000 | -1.21397340 |
| C | 5.98322105  | 0.00000000  | 0.00000000  |
| C | 6.66919374  | 0.00000730  | 1.21396971  |
| C | 8.06322384  | 0.00001064  | 1.20547390  |
| C | 8.76227903  | 0.00000267  | -0.00000234 |
| H | 8.59991312  | -0.00000471 | -2.14520216 |
| H | 6.12441111  | -0.00000413 | -2.14813900 |
| H | 6.12441921  | 0.00001037  | 2.14813590  |
| H | 8.59991026  | 0.00001377  | 2.14519882  |
| H | 9.84396791  | 0.00000271  | 0.00000214  |
| I | 3.90000010  | 0.00000000  | 0.00000000  |

C<sub>6</sub>H<sub>5</sub>I...BrC<sub>6</sub>H<sub>5</sub>

|    |             |             |             |
|----|-------------|-------------|-------------|
| C  | -5.66457800 | 1.20574700  | 0.00000200  |
| C  | -4.27090200 | 1.21418800  | 0.00000200  |
| C  | -3.58984100 | 0.00000000  | 0.00000100  |
| C  | -4.27090200 | -1.21418700 | -0.00000100 |
| C  | -5.66457800 | -1.20574500 | -0.00000100 |
| C  | -6.36348600 | 0.00000000  | 0.00000000  |
| H  | -6.20164700 | 2.14512400  | 0.00000200  |
| H  | -3.71941500 | 2.14417100  | 0.00000300  |
| H  | -3.71941700 | -2.14417000 | -0.00000300 |
| H  | -6.20164500 | -2.14512400 | -0.00000400 |
| H  | -7.44507200 | -0.00000200 | 0.00000000  |
| Br | -1.70869500 | 0.00000000  | 0.00000000  |
| C  | 6.20452700  | 1.20547876  | -0.00000124 |
| C  | 4.81049600  | 1.21397176  | 0.00000076  |
| C  | 4.12452600  | -0.00000124 | -0.00000224 |
| C  | 4.81049800  | -1.21397124 | 0.00000176  |
| C  | 6.20452800  | -1.20547524 | 0.00000476  |
| C  | 6.90358400  | 0.00000076  | -0.00000124 |
| H  | 6.74121800  | 2.14520076  | -0.00000324 |
| H  | 4.26571600  | 2.14813776  | -0.00000124 |
| H  | 4.26572400  | -2.14813724 | 0.00000276  |
| H  | 6.74121500  | -2.14520024 | 0.00000476  |
| H  | 7.98527300  | -0.00000424 | -0.00000124 |
| I  | 2.04130500  | -0.00000124 | -0.00000124 |

C<sub>6</sub>H<sub>5</sub>I...ClC<sub>6</sub>H<sub>5</sub>

|    |             |             |             |
|----|-------------|-------------|-------------|
| C  | -6.43283650 | 1.20579020  | 0.00000561  |
| C  | -5.03944150 | 1.21390720  | 0.00000061  |
| C  | -4.35860150 | -0.00000180 | -0.00000439 |
| C  | -5.03944650 | -1.21390880 | -0.00000139 |
| C  | -6.43284350 | -1.20578380 | 0.00000661  |
| C  | -7.13210450 | 0.00000420  | 0.00000661  |
| H  | -6.96954150 | 2.14531920  | 0.00000761  |
| H  | -4.48444450 | 2.14167420  | 0.00000161  |
| H  | -4.48445850 | -2.14167880 | -0.00000039 |
| H  | -6.96954750 | -2.14531380 | 0.00000661  |
| H  | -8.21360250 | 0.00000720  | 0.00001061  |
| Cl | -2.62235450 | -0.00000180 | -0.00000439 |
| C  | 5.22086750  | 1.20547980  | 0.00000239  |
| C  | 3.82683650  | 1.21397280  | 0.00000239  |
| C  | 3.14086550  | -0.00000120 | -0.00000161 |
| C  | 3.82683850  | -1.21397020 | 0.00000139  |
| C  | 5.22086850  | -1.20547420 | 0.00000539  |
| C  | 5.91992350  | 0.00000180  | 0.00000239  |



|   |            |             |             |
|---|------------|-------------|-------------|
| H | 5.75755750 | 2.14520180  | 0.00000239  |
| H | 3.28205550 | 2.14813780  | 0.00000139  |
| H | 3.28206450 | -2.14813720 | 0.00000039  |
| H | 5.75755550 | -2.14519920 | 0.00000539  |
| H | 7.00161250 | -0.00000220 | 0.00000239  |
| I | 1.05764550 | -0.00000120 | -0.00000261 |

C<sub>6</sub>H<sub>5</sub>I...FC<sub>6</sub>H<sub>5</sub>

|   |             |             |             |
|---|-------------|-------------|-------------|
| C | 4.91469200  | 1.20654513  | 0.00001043  |
| C | 3.52094100  | 1.21543013  | 0.00000043  |
| C | 2.85461100  | 0.00000013  | -0.00000757 |
| C | 3.52094000  | -1.21543087 | 0.00000043  |
| C | 4.91469000  | -1.20654787 | 0.00000943  |
| C | 5.61292200  | -0.00000187 | 0.00001243  |
| H | 5.45222000  | 2.14531413  | 0.00001543  |
| H | 2.95432200  | 2.13589213  | -0.00000057 |
| H | 2.95431800  | -2.13589287 | -0.00000257 |
| H | 5.45221700  | -2.14531687 | 0.00001343  |
| H | 6.69420700  | -0.00000287 | 0.00001843  |
| F | 1.50480100  | 0.00000013  | -0.00000557 |
| C | -5.92842100 | 1.20547900  | 0.00000200  |
| C | -4.53439000 | 1.21397200  | -0.00000100 |
| C | -3.84842000 | -0.00000100 | 0.00000300  |
| C | -4.53439200 | -1.21397100 | 0.00000100  |
| C | -5.92842200 | -1.20547500 | 0.00000000  |
| C | -6.62747800 | 0.00000100  | 0.00000400  |
| H | -6.46511200 | 2.14520100  | 0.00000300  |
| H | -3.98961000 | 2.14813800  | -0.00000200 |
| H | -3.98961700 | -2.14813700 | 0.00000100  |
| H | -6.46510800 | -2.14520000 | 0.00000200  |
| H | -7.70916600 | -0.00000400 | 0.00000600  |
| I | -1.76519900 | -0.00000100 | -0.00000100 |

C<sub>6</sub>H<sub>5</sub>Br...BrC<sub>6</sub>H<sub>5</sub>

|   |             |             |             |
|---|-------------|-------------|-------------|
| C | -4.01088303 | -0.00000346 | -1.20574605 |
| C | -2.61720698 | -0.00000272 | -1.21418798 |
| C | -1.93614595 | 0.00000000  | 0.00000000  |
| C | -2.61720698 | 0.00000000  | 1.21418703  |
| C | -4.01088303 | -0.00000075 | 1.20574498  |
| C | -4.70979088 | -0.00000247 | 0.00000100  |
| H | -4.54795187 | -0.00000579 | -2.14512300 |
| H | -2.06572001 | -0.00000347 | -2.14417100 |
| H | -2.06572192 | 0.00000134  | 2.14417005  |
| H | -4.54794901 | -0.00000098 | 2.14512491  |
| H | -5.79137676 | -0.00000305 | 0.00000300  |

Unconventional Type III halogen...halogen interactions

|    |             |             |             |
|----|-------------|-------------|-------------|
| Br | -0.05500000 | 0.00000000  | 0.00000000  |
| C  | 7.51088303  | -0.00000271 | 1.20574605  |
| C  | 6.11720722  | -0.00000197 | 1.21418798  |
| C  | 5.43614595  | 0.00000000  | 0.00000000  |
| C  | 6.11720722  | -0.00000076 | -1.21418703 |
| C  | 7.51088303  | -0.00000150 | -1.20574498 |
| C  | 8.20979088  | -0.00000248 | -0.00000100 |
| H  | 8.04795187  | -0.00000446 | 2.14512300  |
| H  | 5.56571978  | -0.00000214 | 2.14417100  |
| H  | 5.56572216  | 0.00000000  | -2.14417005 |
| H  | 8.04794901  | -0.00000232 | -2.14512491 |
| H  | 9.29137676  | -0.00000305 | -0.00000300 |
| Br | 3.55500000  | 0.00000000  | 0.00000000  |

C<sub>6</sub>H<sub>5</sub>Br...ClC<sub>6</sub>H<sub>5</sub>

|    |             |             |             |
|----|-------------|-------------|-------------|
| C  | 5.34290000  | 1.20574695  | 0.00000292  |
| C  | 3.94922400  | 1.21418795  | 0.00000092  |
| C  | 3.26816300  | -0.00000005 | -0.00000108 |
| C  | 3.94922500  | -1.21418705 | 0.00000092  |
| C  | 5.34290100  | -1.20574405 | 0.00000192  |
| C  | 6.04180800  | -0.00000005 | 0.00000392  |
| H  | 5.87996800  | 2.14512395  | 0.00000492  |
| H  | 3.39773600  | 2.14417095  | 0.00000092  |
| H  | 3.39774000  | -2.14417005 | -0.00000008 |
| H  | 5.87996700  | -2.14512405 | 0.00000392  |
| H  | 7.12339400  | -0.00000205 | 0.00000492  |
| Br | 1.38701700  | -0.00000105 | -0.00000208 |
| C  | -5.95346600 | 1.20578900  | 0.00000400  |
| C  | -4.56007100 | 1.21390700  | -0.00000100 |
| C  | -3.87923000 | -0.00000300 | -0.00000500 |
| C  | -4.56007500 | -1.21390900 | -0.00000100 |
| C  | -5.95347200 | -1.20578500 | 0.00000600  |
| C  | -6.65273300 | 0.00000400  | 0.00000500  |
| H  | -6.49017100 | 2.14531900  | 0.00000500  |
| H  | -4.00507400 | 2.14167400  | -0.00000100 |
| H  | -4.00508700 | -2.14167900 | 0.00000000  |
| H  | -6.49017700 | -2.14531400 | 0.00000600  |
| H  | -7.73423000 | 0.00000700  | 0.00000900  |
| Cl | -2.14298300 | -0.00000200 | -0.00000400 |

C<sub>6</sub>H<sub>5</sub>Br...FC<sub>6</sub>H<sub>5</sub>

|   |            |             |             |
|---|------------|-------------|-------------|
| C | 3.19257800 | -1.21418820 | 0.00000368  |
| C | 2.51151700 | -0.00000020 | -0.00000032 |
| C | 3.19257800 | 1.21418680  | -0.00000432 |
| C | 4.58625400 | 1.20574480  | -0.00000232 |

Unconventional Type III halogen...halogen interactions

|    |             |             |             |
|----|-------------|-------------|-------------|
| C  | 5.28516200  | 0.00000080  | 0.00000268  |
| H  | 5.12332300  | -2.14512320 | 0.00000868  |
| H  | 2.64109100  | -2.14417120 | 0.00000668  |
| H  | 2.64109300  | 2.14416980  | -0.00000832 |
| H  | 5.12332000  | 2.14512480  | -0.00000632 |
| H  | 6.36674800  | 0.00000280  | 0.00000368  |
| Br | 0.63037100  | -0.00000020 | -0.00000332 |
| C  | -5.93952000 | -1.20654600 | 0.00000200  |
| C  | -4.54576900 | -1.21543100 | -0.00000700 |
| C  | -3.87943800 | -0.00000100 | -0.00001100 |
| C  | -4.54576700 | 1.21543000  | 0.00000100  |
| C  | -5.93951700 | 1.20654700  | 0.00001000  |
| C  | -6.63775000 | 0.00000100  | 0.00000900  |
| H  | -6.47704800 | -2.14531500 | 0.00000400  |
| H  | -3.97915000 | -2.13589300 | -0.00001200 |
| H  | -3.97914500 | 2.13589200  | 0.00000300  |
| H  | -6.47704400 | 2.14531600  | 0.00001800  |
| H  | -7.71903500 | 0.00000300  | 0.00001500  |
| F  | -2.52962900 | -0.00000100 | -0.00000900 |

C<sub>6</sub>H<sub>5</sub>Cl...ClC<sub>6</sub>H<sub>5</sub>

|    |             |             |             |
|----|-------------|-------------|-------------|
| C  | 1.20579200  | 5.93048300  | 0.00000500  |
| C  | 1.21391000  | 4.53708800  | -0.00000100 |
| C  | 0.00000000  | 3.85624700  | -0.00000500 |
| C  | -1.21390600 | 4.53709200  | -0.00000100 |
| C  | -1.20578200 | 5.93048900  | 0.00000700  |
| C  | 0.00000700  | 6.62975000  | 0.00000700  |
| H  | 2.14532200  | 6.46718800  | 0.00000600  |
| H  | 2.14167600  | 3.98209000  | -0.00000100 |
| H  | -2.14167700 | 3.98210500  | 0.00000000  |
| H  | -2.14531100 | 6.46719400  | 0.00000800  |
| H  | 0.00001000  | 7.71124800  | 0.00001200  |
| Cl | 0.00000000  | 2.12000000  | -0.00000500 |
| C  | -1.20579200 | -5.16048300 | 0.00000500  |
| C  | -1.21391000 | -3.76708800 | -0.00000100 |
| C  | 0.00000000  | -3.08624700 | -0.00000500 |
| C  | 1.21390600  | -3.76709200 | -0.00000100 |
| C  | 1.20578200  | -5.16048900 | 0.00000700  |
| C  | -0.00000700 | -5.85975000 | 0.00000700  |
| H  | -2.14532200 | -5.69718800 | 0.00000600  |
| H  | -2.14167600 | -3.21209000 | -0.00000100 |
| H  | 2.14167700  | -3.21210500 | 0.00000000  |
| H  | 2.14531100  | -5.69719400 | 0.00000800  |
| H  | -0.00001000 | -6.94124800 | 0.00001200  |
| Cl | 0.00000000  | -1.35000000 | -0.00000500 |

Unconventional Type III halogen...halogen interactions

C<sub>6</sub>H<sub>5</sub>Cl...FC<sub>6</sub>H<sub>5</sub>

|    |             |             |             |
|----|-------------|-------------|-------------|
| C  | -5.09406200 | 1.20578900  | 0.00001300  |
| C  | -3.70066700 | 1.21390700  | 0.00000600  |
| C  | -3.01982500 | -0.00000200 | -0.00000600 |
| C  | -3.70067000 | -1.21390900 | -0.00000800 |
| C  | -5.09406700 | -1.20578500 | 0.00000100  |
| C  | -5.79332800 | 0.00000300  | 0.00000800  |
| H  | -5.63076700 | 2.14531800  | 0.00002100  |
| H  | -3.14567000 | 2.14167400  | 0.00001100  |
| H  | -3.14568200 | -2.14167900 | -0.00001300 |
| H  | -5.63077200 | -2.14531500 | -0.00000300 |
| H  | -6.87482700 | 0.00000600  | 0.00001400  |
| Cl | -1.28357900 | -0.00000200 | -0.00000700 |
| C  | 5.26631200  | 1.20654704  | 0.00000096  |
| C  | 3.87256100  | 1.21543104  | -0.00000904 |
| C  | 3.20623000  | 0.00000104  | -0.00001104 |
| C  | 3.87256000  | -1.21542996 | 0.00000396  |
| C  | 5.26631000  | -1.20654596 | 0.00001396  |
| C  | 5.96454200  | 0.00000004  | 0.00001096  |
| H  | 5.80383900  | 2.14531604  | 0.00000096  |
| H  | 3.30594100  | 2.13589304  | -0.00001704 |
| H  | 3.30593900  | -2.13589296 | 0.00000696  |
| H  | 5.80383700  | -2.14531496 | 0.00002496  |
| H  | 7.04582700  | -0.00000196 | 0.00001796  |
| F  | 1.85642100  | 0.00000004  | -0.00001004 |

HalomethaneCH<sub>3</sub>I...ICH<sub>3</sub>

|   |             |             |             |
|---|-------------|-------------|-------------|
| C | -2.12287211 | 0.00000000  | 0.00000000  |
| H | -2.45246005 | 0.00000000  | 1.03174102  |
| H | -2.45246005 | -0.89351404 | -0.51586998 |
| H | -2.45246005 | 0.89351398  | -0.51586998 |
| I | 0.00000000  | 0.00000000  | 0.00000000  |
| C | 6.06287188  | 0.00000000  | 0.00000000  |
| H | 6.39245981  | -0.89351416 | 0.51587009  |
| H | 6.39245981  | 0.89351326  | 0.51587123  |
| H | 6.39245981  | 0.00000000  | -1.03174078 |
| I | 3.94000000  | 0.00000000  | 0.00000000  |

CH<sub>3</sub>I...BrCH<sub>3</sub>

|   |             |            |            |
|---|-------------|------------|------------|
| C | -1.92430401 | 0.00000000 | 0.00000000 |
| H | -2.25771689 | 0.00000000 | 1.03069699 |

Unconventional Type III halogen...halogen interactions

|    |             |             |             |
|----|-------------|-------------|-------------|
| H  | -2.25771689 | -0.89261001 | -0.51534897 |
| H  | -2.25771689 | 0.89261001  | -0.51534897 |
| Br | 0.00000000  | 0.00000000  | 0.00000000  |
| C  | 5.91287188  | 0.00000000  | 0.00000000  |
| H  | 6.24245981  | 0.00000000  | -1.03174102 |
| H  | 6.24245981  | -0.89351398 | 0.51586998  |
| H  | 6.24245981  | 0.89351398  | 0.51586998  |
| I  | 3.79000000  | 0.00000000  | 0.00000000  |

CH<sub>3</sub>I...ClCH<sub>3</sub>

|    |             |             |             |
|----|-------------|-------------|-------------|
| C  | -1.78047502 | 0.00000000  | 0.00000000  |
| H  | -2.12192202 | 0.00000000  | 1.02879500  |
| H  | -2.12192202 | -0.89096200 | -0.51439703 |
| H  | -2.12192202 | 0.89096200  | -0.51439703 |
| Cl | 0.00000000  | 0.00000000  | 0.00000000  |
| C  | 5.83287188  | 0.00000000  | 0.00000000  |
| H  | 6.16245981  | 0.00000034  | -1.03174102 |
| H  | 6.16245981  | -0.89351416 | 0.51586968  |
| H  | 6.16245981  | 0.89351386  | 0.51587027  |
| I  | 3.71000000  | 0.00000000  | 0.00000000  |

CH<sub>3</sub>I...FCH<sub>3</sub>

|   |             |             |             |
|---|-------------|-------------|-------------|
| C | -1.38842297 | 0.00000000  | 0.00000000  |
| H | -1.73670304 | 0.00000000  | 1.02973104  |
| H | -1.73670304 | -0.89177299 | -0.51486498 |
| H | -1.73670304 | 0.89177299  | -0.51486498 |
| F | 0.00000000  | 0.00000000  | 0.00000000  |
| C | 5.40287188  | 0.00000000  | 0.00000000  |
| H | 5.73245981  | -0.00000014 | -1.03174102 |
| H | 5.73245981  | -0.89351392 | 0.51587009  |
| H | 5.73245981  | 0.89351410  | 0.51586986  |
| I | 3.28000000  | 0.00000000  | 0.00000000  |

CH<sub>3</sub>Br...BrCH<sub>3</sub>

|    |             |             |             |
|----|-------------|-------------|-------------|
| C  | -1.92430401 | 0.00000000  | 0.00000000  |
| H  | -2.25771689 | 0.00000000  | 1.03069699  |
| H  | -2.25771689 | -0.89260995 | -0.51534897 |
| H  | -2.25771689 | 0.89260995  | -0.51534903 |
| Br | 0.00000000  | 0.00000000  | 0.00000000  |
| C  | 5.57430401  | 0.00000000  | 0.00000000  |
| H  | 5.90771713  | -0.89260966 | 0.51534879  |
| H  | 5.90771713  | 0.89261049  | 0.51534820  |
| H  | 5.90771713  | 0.00000000  | -1.03069746 |
| Br | 3.65000000  | 0.00000000  | 0.00000000  |

CH<sub>3</sub>Br...ClCH<sub>3</sub>

|    |             |             |             |
|----|-------------|-------------|-------------|
| C  | -1.92430401 | 0.00000000  | 0.00000000  |
| H  | -2.25771689 | 0.00000000  | 1.03069699  |
| H  | -2.25771689 | -0.89261001 | -0.51534897 |
| H  | -2.25771689 | 0.89261001  | -0.51534897 |
| Br | 0.00000000  | 0.00000000  | 0.00000000  |
| C  | 5.36047514  | 0.00000000  | 0.00000000  |
| H  | 5.70192202  | -0.89096242 | 0.51439780  |
| H  | 5.70192202  | 0.89096200  | 0.51439697  |
| H  | 5.70192202  | -0.00000046 | -1.02879429 |
| Cl | 3.58000000  | 0.00000000  | 0.00000000  |

CH<sub>3</sub>Br...FCH<sub>3</sub>

|    |             |             |             |
|----|-------------|-------------|-------------|
| C  | -1.92430401 | -0.00000000 | 0.00000000  |
| H  | -2.25771689 | 0.00000000  | 1.03069699  |
| H  | -2.25771689 | -0.89261001 | -0.51534897 |
| H  | -2.25771689 | 0.89261001  | -0.51534897 |
| Br | -0.00000000 | 0.00000000  | 0.00000000  |
| C  | 4.58842301  | 0.00000000  | 0.00000000  |
| H  | 4.93670297  | -0.89177322 | 0.51486552  |
| H  | 4.93670297  | 0.89177269  | 0.51486558  |
| H  | 4.93670297  | -0.00000034 | -1.02973056 |
| F  | 3.20000005  | 0.00000000  | 0.00000000  |

CH<sub>3</sub>Cl...ClCH<sub>3</sub>

|    |             |             |             |
|----|-------------|-------------|-------------|
| C  | -1.78047502 | 0.00000000  | 0.00000000  |
| H  | -2.12192202 | 0.00000000  | 1.02879500  |
| H  | -2.12192202 | -0.89096200 | -0.51439703 |
| H  | -2.12192202 | 0.89096200  | -0.51439703 |
| Cl | 0.00000000  | 0.00000000  | 0.00000000  |
| C  | 5.32047514  | 0.00000000  | 0.00000000  |
| H  | 5.66192202  | 0.00000000  | -1.02879500 |
| H  | 5.66192202  | -0.89096200 | 0.51439703  |
| H  | 5.66192202  | 0.89096200  | 0.51439703  |
| Cl | 3.54000000  | 0.00000000  | 0.00000000  |

CH<sub>3</sub>Cl...FCH<sub>3</sub>

|    |             |             |             |
|----|-------------|-------------|-------------|
| C  | -1.78047502 | 0.00000000  | 0.00000000  |
| H  | -2.12192202 | 0.00000000  | 1.02879500  |
| H  | -2.12192202 | -0.89096200 | -0.51439703 |
| H  | -2.12192202 | 0.89096200  | -0.51439703 |
| Cl | 0.00000000  | 0.00000000  | 0.00000000  |
| C  | 4.61842297  | 0.00000000  | 0.00000000  |
| H  | 4.96670292  | 0.00000020  | -1.02973104 |
| H  | 4.96670292  | -0.89177310 | 0.51486480  |

Unconventional Type III halogen...halogen interactions

|   |            |            |            |
|---|------------|------------|------------|
| H | 4.96670292 | 0.89177293 | 0.51486516 |
| F | 3.23000000 | 0.00000000 | 0.00000000 |
